# Supplementary material
Source: publisher figshare collection journal article supplement (https://springernature.figshare.com/ndownloader/files/15323882)
Supplement: Supplementary file 1 [file 15323882]

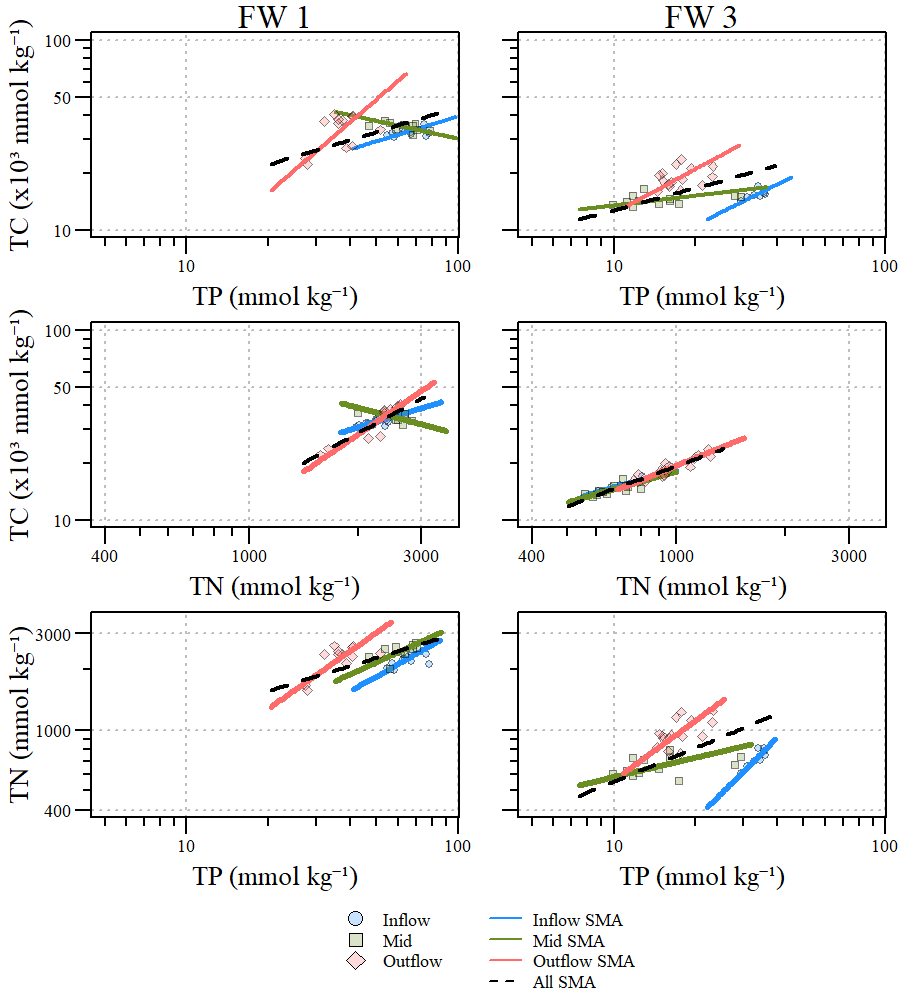


Figure S4. Stoichiometric relationships between total carbon (TC), total phosphorus (TP) and total nitrogen (TN) in floc ecosystem compartment for Stormwater Treatment Area 2, flow-ways (FWs) 1 and 3. Inflow, mid, outflow and overall standardized major axis (SMA) regressions indicated by lines through the data. Values can be converted to mass per volume (i.e. milligram per kilogram) concentration by multiplying each value by its respective conversion factor (C = 12.01; N = 14.00; P = 30.97).
